# Supplementary material for: Almond Skin Extracts and Chlorogenic Acid Delay Replicative Aging by Enhanced Oxidative Stress Response Involving SIR2 and SOD2 in Yeast
Source: Preprints.org preprint supplement (doi:10.20944/preprints202004.0429.v1), 2020-04-24
Supplement: Supplementary file 1 [file supplementary]

**Figure S1:** (a) HPLC chromatogram (detection set at 325 nm) of the almond skin extract (*Beldi* genotype grown in the Ain Sfa (34°46'42.4"N, 002°09'28.9"W) pilot location in the eastern Morocco) prepared by ultrasound-assisted extraction USAE. (b) Structures and corresponding numbers on the HPLC chromatogram of the main phenolic compounds considered in this study: protocatechuic acid (1), *p*-hydroxybenzoic acid (2), chlorogenic acid (3) and *p*-coumaric acid (4).

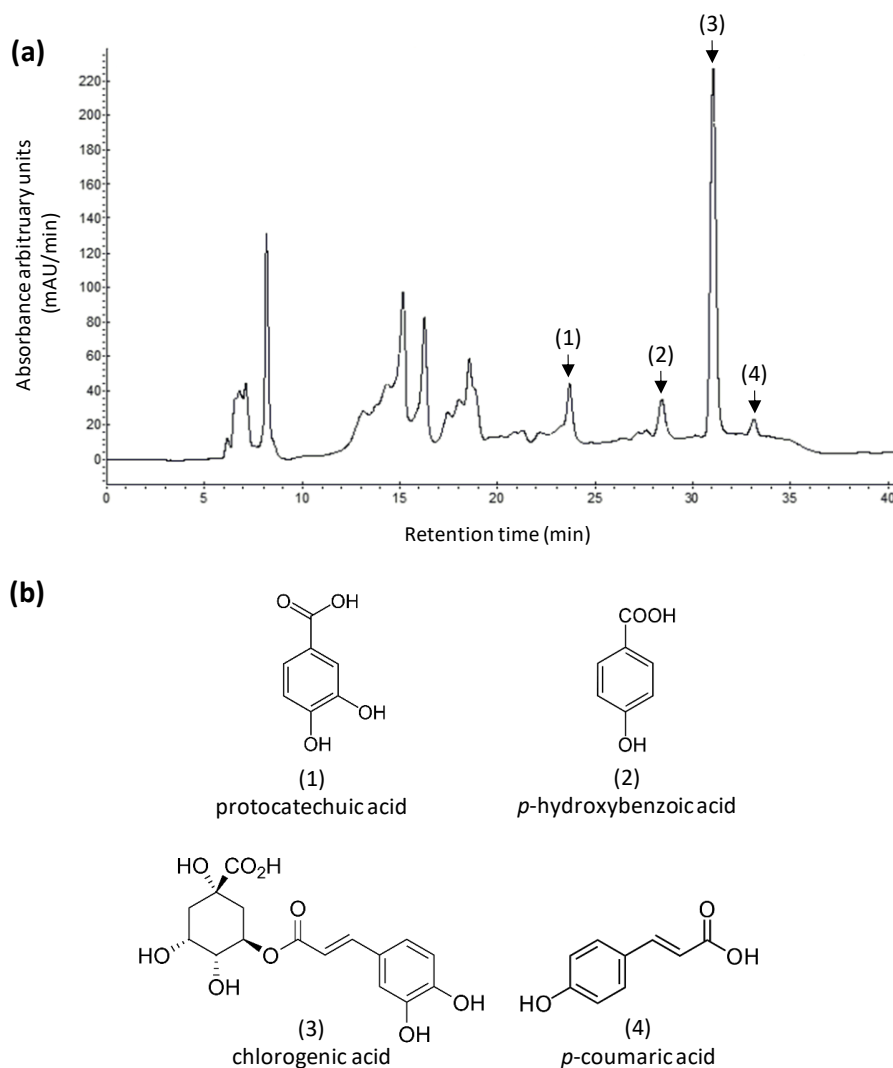

**Figure S2:** Mitochondria integrity estimated by mitochondrial potential ( $\Delta\Psi_m$ ) variation.

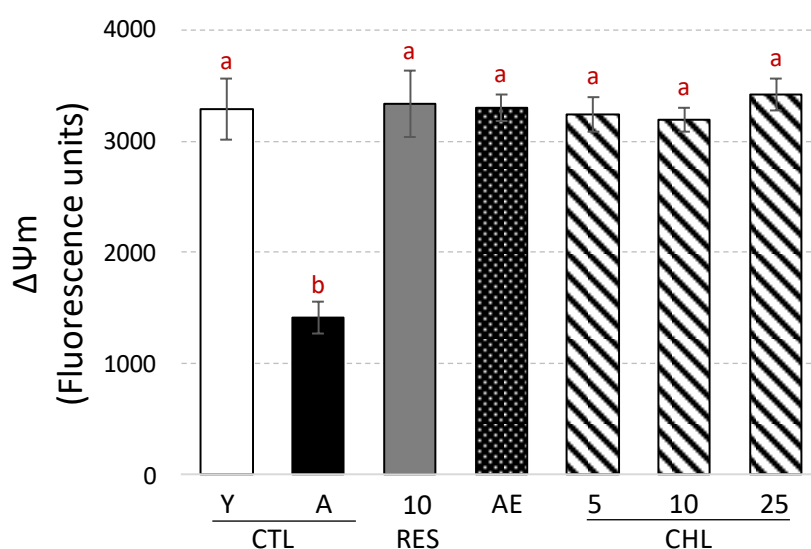

The evaluation of mitochondria membrane potential ( $\Delta\Psi_m$ ) was carried out by treating cells with 3,3'-diethyloxycarbocyanineiodide (DiOC6(3), Sigma-Aldrich, Saint-Quentin Fallavier, France). DiOC6(3) stains mitochondria depending on their  $\Delta\Psi_m$ . Cells were incubated in culture medium with 25 nM DiOC6(3) for 40 min at 28°C. Results were expressed as relative fluorescent units. Values are means  $\pm$  SD of 6 independent replicates. Different letters represent significant differences between the different conditions ( $p < 0.05$ ).

**Table S1:** Absolute quantification of chlorogenic acid (and other phenolic acids) contents in US almond skin extract <sup>2</sup> (in mg/g DW) and final concentration (in  $\mu$ M) applied on yeast.

|                                                   | TPC <sup>1</sup> | protocatechuic acid | <i>p</i> -hydroxybenzoic acid | chlorogenic acid | <i>p</i> -coumaric acid |
|---------------------------------------------------|------------------|---------------------|-------------------------------|------------------|-------------------------|
| US extract<br>(mg/g DW)                           | 13.86 $\pm$ 0.91 | 2.03 $\pm$ 0.07     | 1.13 $\pm$ 0.02               | 8.14 $\pm$ 0.10  | 0.26 $\pm$ 0.20         |
| Concentration<br>applied on yeast<br>(in $\mu$ M) | 88.00 $\pm$ 5.78 | 14.15 $\pm$ 0.49    | 8.83 $\pm$ 0.16               | 25.00 $\pm$ 0.30 | 1.58 $\pm$ 1.31         |

US: ultrasound; <sup>1</sup>TPC: total phenolic content expressed in gallic acid equivalent; other phenolic acids from the extract are: protocatechuic acid, *p*-hydroxybenzoic acid and *p*-coumaric acid contents. <sup>2</sup> *Beldi* genotype grown in the Ain Sfa (34°46'42.4"N, 002°09'28.9"W) pilot location in the eastern Morocco. Values are means  $\pm$  SD of 3 independent replicates.

**Table S2:** Growth index and viability of yeast cells under the different treatment conditions determined 48h after treatment.

| Conditions  | Growth index               | Viability                 |
|-------------|----------------------------|---------------------------|
| CTL         | 34.25 ± 1.23 <sup>ab</sup> | 95.37 ± 2.61 <sup>a</sup> |
| RES (10 µM) | 34.04 ± 1.72 <sup>ab</sup> | 94.27 ± 2.01 <sup>a</sup> |
| AE          | 36.12 ± 0.67 <sup>a</sup>  | 94.45 ± 1.85 <sup>a</sup> |
| CHL (5 µM)  | 33.47 ± 0.32 <sup>b</sup>  | 94.24 ± 1.78 <sup>a</sup> |
| CHL (10 µM) | 33.88 ± 0.19 <sup>b</sup>  | 96.58 ± 2.92 <sup>a</sup> |
| CHL (25 µM) | 33.38 ± 1.22 <sup>ab</sup> | 96.30 ± 3.04 <sup>a</sup> |

Almond extract (AE, 1 mg/mL); Chlorogenic acid at 3 concentrations (CHL5, CHL10 and CHL25 corresponding to chlorogenic acid addition at 5, 10 and 25 µM, respectively). *E*-Resveratrol (RES, 10 µM) used as control antiaging drug. Values are means ± standard deviations (SD) of 4 independent experiments. Different letters represent significant differences between the different conditions ( $p < 0.05$ ).

**Table S3:** Estimation of chlorogenic acid and *E*-resveratrol uptake by yeast cell determined 6h after their additions in culture medium

| Compound              | Concentrations/<br>Conditions | Relative content in<br>culture medium | Relative content in<br>yeast cells | Total            |
|-----------------------|-------------------------------|---------------------------------------|------------------------------------|------------------|
| <i>E</i> -Resveratrol | 10 $\mu$ M                    | 9.43 $\pm$ 2.59                       | 80.40 $\pm$ 1.81                   | 89.83 $\pm$ 4.40 |
| Chlorogenic acid      | AE 1                          | 19.20 $\pm$ 1.97                      | 70.77 $\pm$ 3.56                   | 89.97 $\pm$ 5.53 |
| Chlorogenic acid      | 5 $\mu$ M                     | 21.10 $\pm$ 2.41                      | 70.70 $\pm$ 0.53                   | 91.80 $\pm$ 2.94 |
| Chlorogenic acid      | 10 $\mu$ M                    | 23.47 $\pm$ 1.01                      | 71.73 $\pm$ 1.47                   | 95.20 $\pm$ 2.48 |
| Chlorogenic acid      | 25 $\mu$ M                    | 16.60 $\pm$ 1.11                      | 74.67 $\pm$ 3.90                   | 91.27 $\pm$ 5.01 |

Values are means  $\pm$  standard deviations (SD) of 4 independent experiments.
